# Supplementary material for: Cyclin L1 participates in Adriamycin resistance and progression of osteosarcoma via PI3K/AKT-mTOR pathway
Source: publisher site journal article supplement (doi:10.18632/aging.205972), 2024-06-26
Supplement: Supplementary file [file aging-v16-205972-supplementary-material-SD1.pdf]

**SUPPLEMENTARY FIGURES**

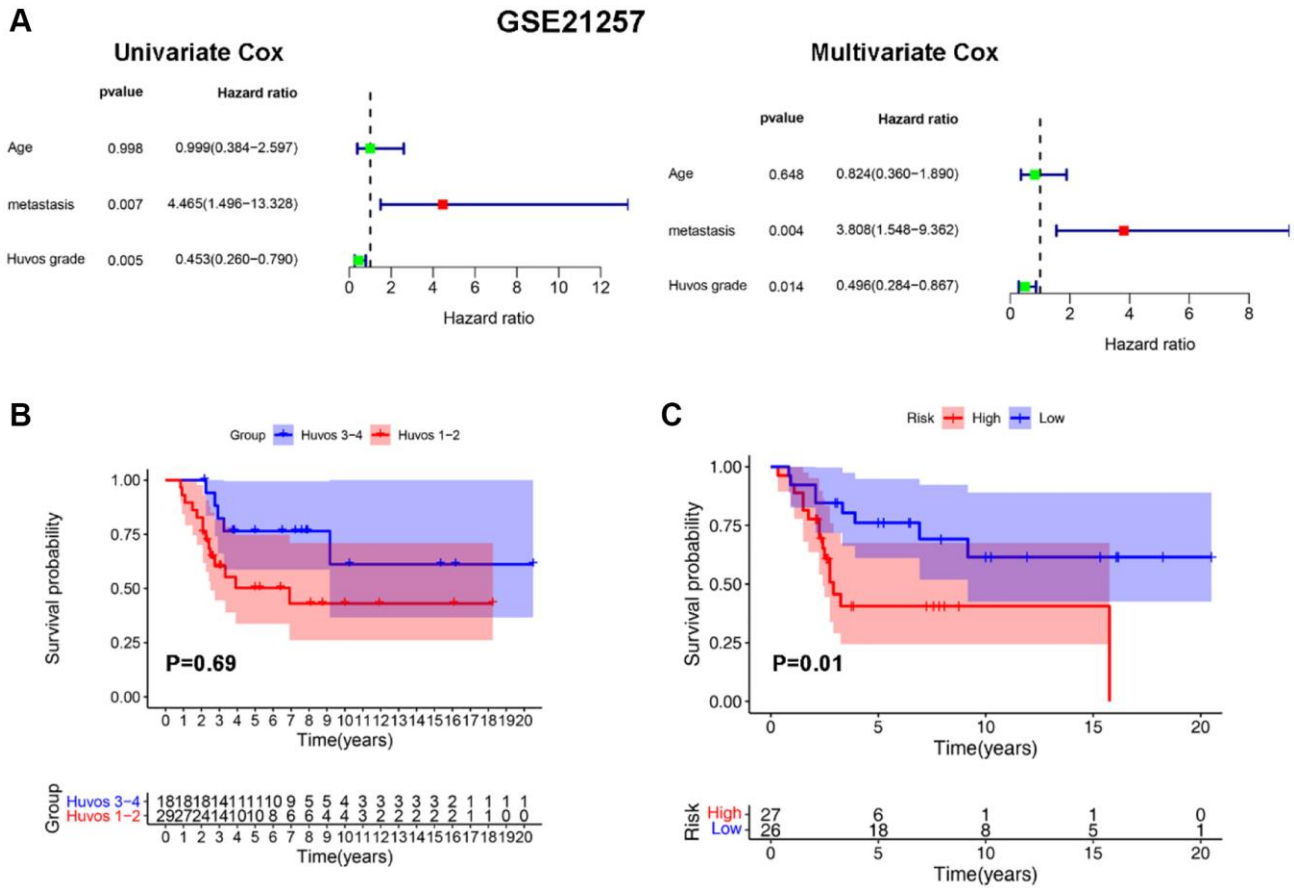

**Supplementary Figure 1. The prognostic value of Huvos grade and CCNL1 in GSE21257 OS cohort.** The Cox regression analysis of Huvos grade in GSE21257 (A). The overall survival analysis between Huvos 1-2 and Huvos 3-4 in GSE21257 (B). High CCNL1 level was correlated with worse prognosis in OS in GSE21257 (C).

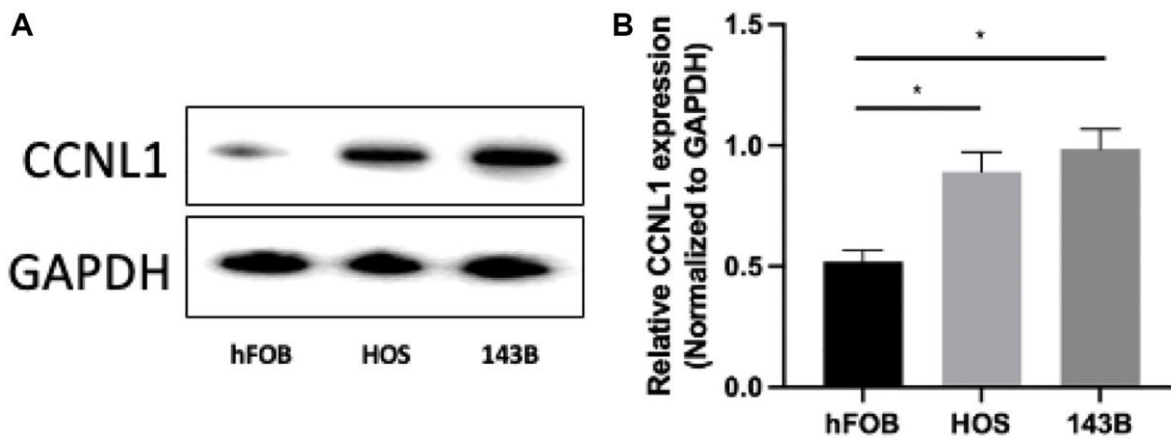

**Supplementary Figure 2. High expression of CCNL1 in OS cells.** The expression level of CCNL1 in hFOB, HOS and 143B was examined by western blot (A) and qRT-PCR (B). \* $P < 0.05$  vs. hFOB.
