# Supplementary material for: Cyclin L1 participates in Adriamycin resistance and progression of osteosarcoma via PI3K/AKT-mTOR pathway
Source: publisher site journal article supplement (doi:10.18632/aging.205972), 2024-06-26
Supplement: Supplementary file [file aging-v16i14-205972-supplementary-material-SD2.pdf]

## SUPPLEMENTARY TABLE

Supplementary Table 1. The primers used for PCR.

| Gene (human) | Forward Primer (5'–3')  | Reverse Primer (3'–5') |
|--------------|-------------------------|------------------------|
| MRP1         | TGCCTGTTTTGGTAAAGAAGCTG | CTTGGAGGAGTACACAACCTTC |
| P-gp         | TCTATGGTTGGCAACTAACACT  | CTCCTGAGTCAAAGAAACAACG |
| CCNL1        | CGTCAAACACAGTTTCGAGATT  | GTCCTTTTTCTCTTAACTGGC  |
| Survivin     | CCGCATCTCTACATTCAAGAAC  | CTCCTTGAAGCAGAAGAAACAC |
| MMP2         | ATTGTATTTGATGGCATCGCTC  | ATTCATTCCCTGCAAAGAACAC |
| AKT          | TGACCATGAACGAGTTTGAGTA  | GAGGATCTTCATGGCGTAGTAG |
| mTOR         | GAGATACGCTGTCCATCCCTTTA | CTGTATTATTGACGGCATGCTC |
| GAPDH        | GTCTCCTCTGACTTCAACAGCG  | ACCACCCTGTTGCTGTAGCCAA |
